# Supplementary material
Source: publisher figshare collection journal article supplement (https://gsapubs.figshare.com/ndownloader/files/36444123)
Supplement: Supplementary file 1 [file 36444123]

## Sheet: S4_DetritalZircon_data_CL
USGS_Sample_Number	LAB_Sample_Number	Mineral	Analysis_Name	U_conc_ppm	Th_conc	U_Th_ratio	207Pb_235U_Ratio	207Pb_235U_Unc	206Pb_238U_Ratio	206Pb_238U_Unc	207Pb_206Pb_Ratio	207Pb_206Pb_Unc	Error_Correlation	207Pb_235U_Age	207Pb_235U_Age_Unc_Minus	207Pb_235U_Age_Unc_Plus	206Pb_238U_Age	206Pb_238U_Age_Unc_Minus	206Pb_238U_Age_Unc_Plus	207Pb_206Pb_Age	207Pb_206Pb_Age_Unc_Minus	207Pb_206Pb_Age_Unc_Plus	Preferred_Age	Preferred_Age_Unc_Minus	Preferred_Age_Unc_Plus	Preferred_Age_Type	Preferred_Age_Concordant_Scans	Preferred_Age_Total_Scans
16CL-DZ2	178-01	zircon	1781AZ1_1	524	221	2.36	0.24	0.01	0.0333	0.0007	0.0525	0.0024	0.16	219.7	9.3	9.3	211.6	4.4	4.4	308.1	109.1	105.6	211.6	4.4	4.4	206Pb/238U concordant scans	56	129
16CL-DZ2	178-01	zircon	1781AZ1_2	634	370	1.71	0.63	0.01	0.0795	0.002	0.0579	0.0014	0.56	499.9	12.1	12	493.5	12.3	12.3	529.3	56.3	55.4	493.5	12.3	12.3	206Pb/238U concordant scans	89	129
16CL-DZ2	178-01	zircon	1781AZ1_3	1477	1297	1.13	0.22	0	0.0321	0.0008	0.0509	0.0015	0.44	206.6	6	6	203.9	5.5	5.5	237.3	70.3	68.8	203.9	5.5	5.5	206Pb/238U concordant scans	91	129
16CL-DZ2	178-01	zircon	1781AZ1_4	572	211	2.7	0.24	0.01	0.0332	0.0012	0.0524	0.0029	0.45	219.1	12.3	12.2	211	8.1	8	307.2	129.7	124.7	211	8.1	8	206Pb/238U concordant scans	29	129
16CL-DZ2	178-01	zircon	1781AZ1_5	500	142	3.52	0.5	0.01	0.0657	0.0015	0.0556	0.0016	0.37	414.8	10.8	10.8	410.5	9.2	9.2	439.1	67.6	66.2	410.5	9.2	9.2	206Pb/238U concordant scans	90	129
16CL-DZ2	178-01	zircon	1781AZ1_6	637	470	1.35	0.52	0.01	0.0688	0.0017	0.0557	0.0014	0.53	431.6	11	11	429.4	10.2	10.2	443.5	59.9	58.8	429.4	10.2	10.2	206Pb/238U concordant scans	100	129
16CL-DZ2	178-01	zircon	1781AZ1_7	472	215	2.19	0.46	0.01	0.0614	0.0012	0.0549	0.0015	0.24	387.9	8.9	8.9	384.3	7.5	7.5	409.5	62.3	61.2	384.3	7.5	7.5	206Pb/238U concordant scans	93	129
16CL-DZ2	178-01	zircon	1781AZ1_8	846	712	1.18	0.22	0	0.0328	0.0007	0.0498	0.0013	0.4	206.4	5.6	5.6	208	4.6	4.6	188.3	65.4	64.1	208	4.6	4.6	206Pb/238U concordant scans	92	129
16CL-DZ2	178-01	zircon	1781AZ1_9	260	76	3.4	0.23	0.01	0.0327	0.001	0.0523	0.0039	0.18	215.7	14.6	14.5	207.9	6.3	6.3	301.6	175.8	166.7	207.9	6.3	6.3	206Pb/238U concordant scans	47	129
16CL-DZ2	178-01	zircon	1781AZ1_10	224	104	2.13	0.48	0.04	0.0632	0.0042	0.0554	0.0046	0.39	400.1	28.2	27.9	395	25.6	25.5	429.3	193.9	182.9	395	25.6	25.5	206Pb/238U concordant scans	111	128
16CL-DZ2	178-01	zircon	1781AZ1_11	323	174	1.85	0.62	0.09	0.0745	0.0038	0.0609	0.0096	0.12	493.4	62.8	60.9	463.2	22.9	22.9	635.9	362.5	325.3	463.2	22.9	22.9	206Pb/238U concordant scans	6	129
16CL-DZ2	178-01	zircon	1781AZ1_12	839	427	1.96	0.53	0.01	0.069	0.0014	0.0558	0.0013	0.48	432.9	9.3	9.3	430.4	8.7	8.7	446.7	52.1	51.3	430.4	8.7	8.7	206Pb/238U concordant scans	83	129
16CL-DZ2	178-01	zircon	1781AZ1_13	440	156	2.81	0.29	0.01	0.0418	0.0007	0.0514	0.0017	0.2	263.8	7.9	7.9	264	4.9	4.9	262	78.3	76.4	264	4.9	4.9	206Pb/238U concordant scans	96	129
16CL-DZ2	178-01	zircon	1781AZ1_14	1490	1313	1.13	0.22	0	0.0323	0.0009	0.051	0.0015	0.44	208	6.1	6.1	205	5.6	5.6	241.3	71.6	70.1	205	5.6	5.6	206Pb/238U concordant scans	85	129
16CL-DZ2	178-01	zircon	1781AZ1_15	520	500	1.04	0.51	0.01	0.0673	0.0014	0.0551	0.0015	0.44	419.7	10.6	10.6	420.2	8.6	8.6	417.2	62.7	61.5	420.2	8.6	8.6	206Pb/238U concordant scans	99	128
16CL-DZ2	178-01	zircon	1781AZ1_16	574	272	2.1	0.48	0.01	0.0637	0.0014	0.0553	0.0015	0.42	402.6	9.9	9.9	398.3	8.7	8.7	427.3	61.5	60.3	398.3	8.7	8.7	206Pb/238U concordant scans	95	129
16CL-DZ2	178-01	zircon	1781AZ1_17	1009	309	3.26	0.53	0.02	0.0686	0.0027	0.056	0.0016	0.72	432.2	14.4	14.3	427.9	16.3	16.2	455.1	64.9	63.7	427.9	16.3	16.2	206Pb/238U concordant scans	106	129
16CL-DZ2	178-01	zircon	1781AZ1_18	258	73	3.5	0.24	0.02	0.033	0.0011	0.054	0.0046	0.18	223.7	17.3	17.2	209.9	7.3	7.3	372	200.3	188.6	209.9	7.3	7.3	206Pb/238U concordant scans	34	129
16CL-DZ2	178-01	zircon	1781AZ1_19	598	138	4.32	0.41	0.01	0.0558	0.0018	0.054	0.0017	0.56	353.3	11.7	11.6	350.4	11.5	11.5	372.2	75.6	73.9	350.4	11.5	11.5	206Pb/238U concordant scans	90	129
16CL-DZ2	178-01	zircon	1781AZ1_20	762	535	1.42	0.25	0	0.0361	0.0007	0.0506	0.0014	0.39	228.4	6.3	6.3	228.6	4.9	4.9	227.1	67.3	65.9	228.6	4.9	4.9	206Pb/238U concordant scans	92	129
16CL-DZ2	178-01	zircon	1781AZ1_21	495	293	1.68	0.42	0.01	0.0563	0.001	0.0548	0.0015	0.22	360.4	8.8	8.7	353.6	6.1	6.1	404.5	64.1	62.9	353.6	6.1	6.1	206Pb/238U concordant scans	93	129
16CL-DZ2	178-01	zircon	1781AZ1_22	86	44	1.95	0.4	0.02	0.0545	0.0011	0.0539	0.0035	0.06	345.8	19	18.8	342.5	7.2	7.2	367.7	150.8	144.1	342.5	7.2	7.2	206Pb/238U concordant scans	68	129
16CL-DZ2	178-01	zircon	1781AZ1_23	285	77	3.66	1.53	0.03	0.1543	0.0027	0.0721	0.0014	0.32	944.6	13.3	13.3	925.3	15	15	989.8	42	41.4	925.3	15	15	206Pb/238U concordant scans	112	129
16CL-DZ2	178-01	zircon	1781AZ1_24	60	35	1.71	0.37	0.04	0.0498	0.0011	0.0549	0.0064	0.03	325.3	32.8	32.2	313.6	7.2	7.2	410	274.3	252.7	313.6	7.2	7.2	206Pb/238U concordant scans	77	128
16CL-DZ2	178-01	zircon	1781AZ1_25	399	183	2.17	0.55	0.04	0.0701	0.0023	0.0571	0.0046	0.16	446.9	29.4	29	437	14	14	498.4	183.8	173.8	437	14	14	206Pb/238U concordant scans	8	129
16CL-DZ2	178-01	zircon	1781AZ1_26	243	156	1.55	0.29	0.01	0.04	0.0012	0.0537	0.0032	0.16	264	13.7	13.6	253	7.9	7.9	362.2	140.7	134.8	253	7.9	7.9	206Pb/238U concordant scans	65	129
16CL-DZ2	178-01	zircon	1781AZ1_27	490	199	2.45	0.51	0.01	0.0678	0.0016	0.0552	0.0016	0.41	422.9	11.4	11.3	423	10.2	10.2	422.7	68.7	67.2	423	10.2	10.2	206Pb/238U concordant scans	89	129
16CL-DZ2	178-01	zircon	1781AZ1_28	1252	808	1.54	0.54	0.04	0.0701	0.005	0.0567	0.0032	0.68	444.1	26.8	26.5	436.8	30.3	30.2	481.9	128.2	123.2	436.8	30.3	30.2	206Pb/238U concordant scans	107	129
16CL-DZ2	178-01	zircon	1781AZ1_29	526	220	2.38	0.24	0.01	0.0337	0.0007	0.0534	0.0029	0.16	225.3	11.1	11.1	213.7	4.9	4.9	348.1	127	122.2	213.7	4.9	4.9	206Pb/238U concordant scans	41	129
16CL-DZ2	178-01	zircon	1781AZ1_30	895	316	2.82	0.22	0	0.032	0.0006	0.0506	0.0014	0.4	204.7	5.8	5.8	203.1	4.3	4.3	223.2	67.4	66	203.1	4.3	4.3	206Pb/238U concordant scans	76	128
16CL-DZ2	178-01	zircon	1781AZ1_31	708	401	1.76	0.27	0	0.0384	0.0009	0.0512	0.0014	0.52	243.9	6.9	6.9	243.2	6	6	250.4	63.7	62.5	243.2	6	6	206Pb/238U concordant scans	78	129
16CL-DZ2	178-01	zircon	1781AZ1_32	362	228	1.58	0.53	0.01	0.0691	0.0015	0.0565	0.0017	0.29	438.1	11.6	11.5	431.2	9.2	9.2	474	70.9	69.4	431.2	9.2	9.2	206Pb/238U concordant scans	85	129
16CL-DZ2	178-01	zircon	1781AZ1_33	767	771	0.99	0.23	0	0.0338	0.001	0.0513	0.0018	0.44	218.2	7.6	7.6	214.6	6.5	6.5	256.7	83.6	81.5	214.6	6.5	6.5	206Pb/238U concordant scans	92	129
16CL-DZ2	178-01	zircon	1781AZ1_34	565	252	2.23	0.25	0.01	0.0358	0.0011	0.0513	0.0019	0.45	230	8.7	8.6	227.3	7.2	7.2	258.5	90.3	87.8	227.3	7.2	7.2	206Pb/238U concordant scans	97	129
16CL-DZ2	178-01	zircon	1781AZ1_35	614	321	1.9	0.56	0.01	0.0725	0.0023	0.0561	0.0016	0.57	452.6	13	12.9	451.3	14.1	14.1	459.3	67.7	66.3	451.3	14.1	14.1	206Pb/238U concordant scans	100	129
16CL-DZ2	178-01	zircon	1781AZ1_36	563	263	2.13	0.58	0.01	0.0746	0.0015	0.0571	0.0013	0.47	469.4	10	10	463.8	9.4	9.4	496.5	52.3	51.5	463.8	9.4	9.4	206Pb/238U concordant scans	96	129
16CL-DZ2	178-01	zircon	1781AZ1_37	344	216	1.58	0.25	0.01	0.0348	0.0008	0.0523	0.0028	0.17	227.6	11	11	220.7	5	5	300	125.4	120.7	220.7	5	5	206Pb/238U concordant scans	58	127
16CL-DZ2	178-01	zircon	1781AZ1_38	241	103	2.33	0.22	0.01	0.0318	0.0008	0.051	0.0031	0.13	205.5	11.4	11.3	202.2	5	5	243.4	145.8	139.6	202.2	5	5	206Pb/238U concordant scans	67	129
16CL-DZ2	178-01	zircon	1781AZ1_39	135	56	2.41	0.3	0.01	0.0424	0.001	0.0517	0.0034	0.07	268.3	15.5	15.4	267.7	6.2	6.2	274	157	149.8	267.7	6.2	6.2	206Pb/238U concordant scans	65	129
16CL-DZ2	178-01	zircon	1781AZ1_40	1076	963	1.11	0.45	0.01	0.0606	0.0013	0.0546	0.0013	0.49	382.4	8.9	8.8	379.8	8.4	8.4	398.5	55.1	54.1	379.8	8.4	8.4	206Pb/238U concordant scans	99	129
16CL-DZ2	178-01	zircon	1781AZ1_41	517	430	1.2	0.26	0.01	0.0367	0.0009	0.0514	0.0018	0.39	235.2	8.2	8.1	232.6	5.7	5.7	262.1	84.1	81.9	232.6	5.7	5.7	206Pb/238U concordant scans	96	129
16CL-DZ2	178-01	zircon	1781AZ1_42	607	1055	0.57	0.25	0.01	0.0362	0.0011	0.0509	0.0019	0.44	230.2	8.5	8.4	229.3	6.9	6.9	239.8	88.5	86.2	229.3	6.9	6.9	206Pb/238U concordant scans	85	129
16CL-DZ2	178-01	zircon	1781AZ1_43	355	160	2.21	0.27	0.01	0.0385	0.001	0.0518	0.0023	0.17	247.2	9.6	9.6	244.1	6.7	6.7	277.4	107.2	103.8	244.1	6.7	6.7	206Pb/238U concordant scans	60	129
16CL-DZ2	178-01	zircon	1781AZ1_44	0	0	0	0	0	0	0	0	0	0	0	0	0	0	0	0	0	0	0	0	0	0	206Pb/238U concordant scans	0	0
16CL-DZ2	178-01	zircon	1781AZ1_45	936	869	1.07	0.35	0.04	0.0469	0.0047	0.0543	0.0066	0.47	306	34.9	34.3	295.4	29.2	29.2	387.2	285.9	262.6	295.4	29.2	29.2	206Pb/238U concordant scans	32	129
16CL-DZ2	178-01	zircon	1781AZ1_46	429	204	2.09	0.3	0.02	0.0426	0.0027	0.0523	0.0033	0.49	272.6	15.8	15.7	269.3	16.7	16.7	300.7	149.1	142.5	269.3	16.7	16.7	206Pb/238U concordant scans	103	129
16CL-DZ2	178-01	zircon	1781AZ1_47	151	97	1.55	0.24	0.02	0.0347	0.0018	0.0508	0.0049	0.31	221.3	20	19.8	220.4	11.5	11.5	231.7	231.4	216	220.4	11.5	11.5	206Pb/238U concordant scans	64	129
16CL-DZ2	178-01	zircon	1781AZ1_48	200	170	1.17	0.49	0.04	0.0642	0.0034	0.0558	0.0049	0.28	408	29.5	29.1	401.1	21	20.9	447	201.9	189.9	401.1	21	20.9	206Pb/238U concordant scans	61	129
16CL-DZ2	178-01	zircon	1781AZ1_49	1240	251	4.92	0.33	0.01	0.0458	0.0023	0.0526	0.0024	0.6	291.7	13.9	13.8	288.8	14.4	14.4	315.1	107.7	104.3	288.8	14.4	14.4	206Pb/238U concordant scans	106	129
16CL-DZ2	178-01	zircon	1781AZ1_50	647	459	1.4	0.47	0.02	0.0611	0.0029	0.0558	0.0023	0.64	391.8	17	16.8	382.8	18.1	18.1	445.4	94.7	92	382.8	18.1	18.1	206Pb/238U concordant scans	102	129
16CL-DZ2	178-01	zircon	1781AZ1_51	825	292	2.82	0.6	0.02	0.0767	0.0028	0.0572	0.0019	0.58	480.8	15.1	14.9	476.5	17.1	17.1	501.4	75	73.2	476.5	17.1	17.1	206Pb/238U concordant scans	110	129
16CL-DZ2	178-01	zircon	1781AZ1_52	488	290	1.68	0.48	0.03	0.0638	0.004	0.0554	0.0039	0.46	403.8	25.1	24.8	398.9	24.6	24.5	431.8	164	156	398.9	24.6	24.5	206Pb/238U concordant scans	48	129
16CL-DZ2	178-01	zircon	1781AZ1_53	690	410	1.68	0.24	0.01	0.0344	0.0012	0.0508	0.0019	0.56	219.8	8.8	8.8	218.2	8	8	236.2	88.7	86.3	218.2	8	8	206Pb/238U concordant scans	95	129
16CL-DZ2	178-01	zircon	1781AZ1_54	197	107	1.83	0.5	0.02	0.0662	0.0016	0.055	0.0022	0.25	413.7	13.9	13.8	413.4	10.2	10.2	415.2	91.9	89.3	413.4	10.2	10.2	206Pb/238U concordant scans	91	129
16CL-DZ2	178-01	zircon	1781AZ1_55	420	223	1.88	0.33	0.01	0.0453	0.0008	0.0529	0.0016	0.19	290.6	7.7	7.7	286	5.4	5.4	327.6	69.9	68.4	286	5.4	5.4	206Pb/238U concordant scans	81	128
16CL-DZ2	178-01	zircon	1781AZ1_56	342	138	2.46	0.49	0.01	0.0648	0.0012	0.0553	0.0016	0.23	407.9	10.3	10.3	404.9	7.4	7.4	425	67.6	66.2	404.9	7.4	7.4	206Pb/238U concordant scans	89	129
16CL-DZ2	178-01	zircon	1781AZ1_57	922	637	1.44	0.32	0	0.0453	0.0009	0.0524	0.0012	0.45	288	6.9	6.8	286.1	6	6	303.9	56.3	55.3	286.1	6	6	206Pb/238U concordant scans	99	129
16CL-DZ2	178-01	zircon	1781AZ1_58	349	132	2.64	0.22	0.01	0.0324	0.0006	0.0505	0.0025	0.11	207.2	9.6	9.6	206	4.1	4.1	220.9	121	116.7	206	4.1	4.1	206Pb/238U concordant scans	84	125
16CL-DZ2	178-01	zircon	1781AZ1_59	152	126	1.2	0.55	0.02	0.0725	0.0014	0.0558	0.0022	0.2	450.8	15	14.9	451.7	8.8	8.8	446.3	91.1	88.6	451.7	8.8	8.8	206Pb/238U concordant scans	83	124
16CL-DZ2	178-01	zircon	1781AZ1_60	443	519	0.85	0.39	0.01	0.0526	0.001	0.0537	0.0015	0.25	334.6	8.3	8.3	330.8	6.3	6.3	361	64.6	63.4	330.8	6.3	6.3	206Pb/238U concordant scans	100	126
16CL-DZ2	178-01	zircon	1781AZ1_61	747	295	2.52	0.4	0.01	0.0548	0.0012	0.0537	0.0012	0.49	346.4	8	8	344.1	7.4	7.4	361.5	54.5	53.6	344.1	7.4	7.4	206Pb/238U concordant scans	103	126
16CL-DZ2	178-01	zircon	1781AZ1_62	474	171	2.77	0.44	0.02	0.0597	0.0034	0.0542	0.0031	0.53	374.8	20	19.8	374	21.2	21.2	379.5	132.7	127.5	374	21.2	21.2	206Pb/238U concordant scans	101	129
16CL-DZ2	178-01	zircon	1781AZ1_63	639	454	1.4	0.47	0.02	0.0626	0.0037	0.055	0.0028	0.63	395	20.5	20.3	391.6	22.9	22.9	414.9	117.9	113.7	391.6	22.9	22.9	206Pb/238U concordant scans	121	129
16CL-DZ2	178-01	zircon	1781AZ1_64	548	132	4.13	0.43	0.06	0.0531	0.0062	0.0599	0.009	0.43	369.8	49.8	48.6	334.1	38.1	37.9	600.3	344.4	310.7	334.1	38.1	37.9	206Pb/238U concordant scans	26	129
16CL-DZ2	178-01	zircon	1781AZ1_65	825	933	0.88	0.25	0.01	0.0357	0.0026	0.0519	0.003	0.67	231.6	14.8	14.7	226.5	16.3	16.3	283.7	135.6	130.1	226.5	16.3	16.3	206Pb/238U concordant scans	115	129
16CL-DZ2	178-01	zircon	1781AZ1_66	324	119	2.72	0.52	0.03	0.0675	0.0041	0.0566	0.0033	0.5	430.1	21.3	21.1	421.4	25.2	25.1	476.5	135.2	129.7	421.4	25.2	25.1	206Pb/238U concordant scans	119	129
16CL-DZ2	178-01	zircon	1781AZ1_67	874	382	2.28	0.35	0.02	0.0464	0.0037	0.0551	0.0038	0.62	307	21.9	21.7	292.8	23.3	23.2	416.6	160	152.4	292.8	23.3	23.2	206Pb/238U concordant scans	98	129
16CL-DZ2	178-01	zircon	1781AZ1_68	358	140	2.55	0.58	0.02	0.0752	0.0029	0.0566	0.0026	0.31	469.6	16.3	16.1	467.9	17.4	17.4	477.9	103.5	100.2	467.9	17.4	17.4	206Pb/238U concordant scans	110	129
16CL-DZ2	178-01	zircon	1781AZ1_69	263	107	2.43	1.16	0.07	0.1216	0.0066	0.0696	0.0046	0.37	786.2	35.6	35	740.2	38.4	38.3	919.3	139.3	133.3	740.2	38.4	38.3	206Pb/238U concordant scans	111	129
16CL-DZ2	178-01	zircon	1781AZ1_70	242	216	1.11	0.52	0.02	0.0683	0.0027	0.056	0.0028	0.4	430.3	18.8	18.6	425.9	16.3	16.3	453.9	115.5	111.4	425.9	16.3	16.3	206Pb/238U concordant scans	94	129
16CL-DZ2	178-01	zircon	1781AZ1_71	534	273	1.95	0.34	0.01	0.0475	0.0012	0.0531	0.0016	0.45	303.5	9.2	9.1	299.3	7.7	7.7	336.2	71.9	70.3	299.3	7.7	7.7	206Pb/238U concordant scans	91	128
16CL-DZ2	178-01	zircon	1781AZ1_72	325	47	6.88	0.38	0.01	0.0519	0.0012	0.0535	0.0021	0.2	329.3	11.2	11.1	326.3	7.6	7.6	350.4	91.5	89	326.3	7.6	7.6	206Pb/238U concordant scans	84	126
16CL-DZ2	178-01	zircon	1781AZ1_73	319	273	1.16	0.33	0.01	0.0442	0.001	0.0542	0.0031	0.13	290	14.7	14.6	279	6.4	6.3	379.8	134.3	128.9	279	6.4	6.3	206Pb/238U concordant scans	35	126
16CL-DZ2	178-01	zircon	1781AZ1_74	955	429	2.22	0.22	0	0.0324	0.0006	0.0505	0.0013	0.41	207.2	5.5	5.5	206	4.3	4.3	221	62.7	61.5	206	4.3	4.3	206Pb/238U concordant scans	96	129
16CL-DZ2	178-01	zircon	1781AZ1_75	57	44	1.3	0.3	0.04	0.0411	0.0011	0.0529	0.0081	0.02	266.8	35.9	35.3	260.2	7.3	7.3	325.4	367.8	330.2	260.2	7.3	7.3	206Pb/238U concordant scans	58	129
16CL-DZ2	178-01	zircon	1781AZ1_76	361	160	2.24	0.32	0.04	0.0444	0.0014	0.0523	0.0065	0.12	282.1	31	30.6	280.1	8.6	8.6	298.5	297.7	272.6	280.1	8.6	8.6	206Pb/238U concordant scans	48	125
16CL-DZ2	178-01	zircon	1781AZ1_77	87	47	1.85	0.33	0.03	0.0464	0.0014	0.0529	0.0053	0.09	296.3	25.8	25.5	292.7	9	9	324.6	238	221.7	292.7	9	9	206Pb/238U concordant scans	58	126
16CL-DZ2	178-01	zircon	1781AZ1_78	842	589	1.43	0.23	0	0.0333	0.0008	0.051	0.0017	0.38	214.3	6.9	6.9	211.7	5.3	5.3	242.5	78	76.2	211.7	5.3	5.3	206Pb/238U concordant scans	75	129
16CL-DZ2	178-01	zircon	1781AZ1_79	441	719	0.61	0.36	0.01	0.0495	0.0011	0.053	0.0017	0.3	314.1	9.3	9.3	311.8	7.2	7.2	330.6	77.1	75.3	311.8	7.2	7.2	206Pb/238U concordant scans	82	129
16CL-DZ2	178-01	zircon	1781AZ1_80	732	469	1.56	0.24	0.01	0.0351	0.0012	0.0509	0.0018	0.54	224.1	8.7	8.6	222.7	7.6	7.6	238.8	86.5	84.2	222.7	7.6	7.6	206Pb/238U concordant scans	97	129
16CL-DZ2	178-01	zircon	1781AZ1_81	259	193	1.34	0.34	0.01	0.0472	0.0012	0.0523	0.0021	0.25	297.8	10.5	10.5	297.7	7.7	7.7	299.3	94	91.3	297.7	7.7	7.7	206Pb/238U concordant scans	96	129
16CL-DZ2	178-01	zircon	1781AZ1_82	541	364	1.48	0.23	0	0.0332	0.0007	0.051	0.0016	0.3	213.4	6.5	6.5	210.8	4.7	4.7	242.7	76.1	74.4	210.8	4.7	4.7	206Pb/238U concordant scans	91	129
16CL-DZ2	178-01	zircon	1781AZ1_83	644	320	2	0.52	0.01	0.0675	0.0016	0.0562	0.0014	0.5	427.6	10.6	10.5	421.3	9.8	9.8	461.3	58.8	57.8	421.3	9.8	9.8	206Pb/238U concordant scans	90	129
16CL-DZ2	178-01	zircon	1781AZ1_84	385	300	1.28	0.25	0.01	0.0364	0.001	0.0516	0.0021	0.27	233.9	8.6	8.6	230.5	6.5	6.5	267.9	96.8	94	230.5	6.5	6.5	206Pb/238U concordant scans	90	127
16CL-DZ2	178-01	zircon	1781AZ1_85	522	383	1.36	0.27	0.01	0.0391	0.0008	0.0506	0.0017	0.33	245.1	8	8	247.4	5.2	5.2	223.8	81.3	79.3	247.4	5.2	5.2	206Pb/238U concordant scans	89	127
16CL-DZ2	178-01	zircon	1781AZ1_86	404	227	1.77	0.23	0.01	0.034	0.0006	0.0504	0.0021	0.15	216	8.2	8.2	215.8	4.1	4.1	217.8	98.8	95.9	215.8	4.1	4.1	206Pb/238U concordant scans	76	129
16CL-DZ2	178-01	zircon	1781AZ1_87	244	105	2.3	0.23	0.01	0.0324	0.0008	0.0518	0.003	0.13	212.1	11.2	11.2	206	5.1	5.1	280.1	138.4	132.7	206	5.1	5.1	206Pb/238U concordant scans	71	129
16CL-DZ2	178-01	zircon	1781AZ1_88	754	742	1.01	0.24	0	0.035	0.0011	0.0513	0.0018	0.44	225	7.9	7.9	221.8	6.9	6.9	258.6	84.8	82.6	221.8	6.9	6.9	206Pb/238U concordant scans	95	129
16CL-DZ2	178-01	zircon	1781AZ1_89	809	353	2.28	0.23	0	0.0332	0.0008	0.0504	0.0015	0.45	211.4	6.5	6.5	211	5.5	5.5	215.5	72	70.4	211	5.5	5.5	206Pb/238U concordant scans	86	127
16CL-DZ2	178-01	zircon	1781AZ1_90	351	132	2.64	0.23	0.01	0.0329	0.0006	0.051	0.0025	0.11	211.7	9.7	9.6	208.9	4.2	4.2	242.6	119.1	114.8	208.9	4.2	4.2	206Pb/238U concordant scans	85	125
16CL-DZ2	178-01	zircon	1781AZ1_91	295	272	1.08	0.51	0.02	0.0668	0.0022	0.0556	0.0023	0.31	420.2	14	13.9	417	13.4	13.4	438.2	93.7	91.1	417	13.4	13.4	206Pb/238U concordant scans	89	127
16CL-DZ2	178-01	zircon	1781AZ1_92	397	163	2.43	0.54	0.02	0.0703	0.002	0.0558	0.0021	0.34	439.6	13.9	13.8	438.3	12.4	12.4	446.4	85.2	83	438.3	12.4	12.4	206Pb/238U concordant scans	92	126
16CL-DZ2	178-01	zircon	1781AZ1_93	365	167	2.17	0.35	0.01	0.0485	0.0012	0.0527	0.0022	0.22	307.4	11.1	11	305.7	7.7	7.7	320.1	96.3	93.6	305.7	7.7	7.7	206Pb/238U concordant scans	100	129
16CL-DZ2	178-01	zircon	1781AZ1_94	300	150	2	0.25	0.01	0.0354	0.0014	0.0518	0.0034	0.33	229.2	14.1	14	224.4	9.3	9.3	279	155.6	148.5	224.4	9.3	9.3	206Pb/238U concordant scans	59	128
16CL-DZ2	178-01	zircon	1781AZ1_95	803	373	2.15	0.26	0.01	0.0379	0.001	0.0511	0.0017	0.44	240.7	8	8	240	6.7	6.7	247.1	79.9	77.9	240	6.7	6.7	206Pb/238U concordant scans	104	129
16CL-DZ2	178-01	zircon	1781AZ1_96	810	867	0.93	0.24	0.01	0.0344	0.0017	0.0519	0.0024	0.59	223.7	11.1	11	218.1	10.9	10.9	282.2	108.5	105	218.1	10.9	10.9	206Pb/238U concordant scans	102	128
16CL-DZ2	178-01	zircon	1781AZ1_97	185	137	1.35	0.32	0.02	0.0442	0.0017	0.0533	0.0034	0.27	286	16.1	16	279.1	10.9	10.9	342.8	150.1	143.5	279.1	10.9	10.9	206Pb/238U concordant scans	69	125
16CL-DZ2	178-01	zircon	1781AZ1_98	305	149	2.05	0.43	0.01	0.0589	0.0023	0.0532	0.0024	0.36	365.6	13.6	13.5	369.4	14.2	14.2	341	104.4	101.1	369.4	14.2	14.2	206Pb/238U concordant scans	94	126
16CL-DZ2	178-01	zircon	1781AZ1_99	252	179	1.4	0.28	0.01	0.0395	0.0017	0.0524	0.0031	0.34	255.7	13.4	13.4	250.2	11	11	306.2	138.7	133	250.2	11	11	206Pb/238U concordant scans	93	127
16CL-DZ2	178-01	zircon	1781AZ1_100	417	270	1.54	0.32	0.01	0.0449	0.0015	0.053	0.0022	0.38	288.6	11	10.9	283.6	9.8	9.7	328.9	98.2	95.3	283.6	9.8	9.7	206Pb/238U concordant scans	82	128
16CL-DZ2	178-01	zircon	1781AZ1_101	471	215	2.19	0.31	0.01	0.0442	0.001	0.0517	0.0016	0.26	278.6	7.8	7.8	279.1	6.2	6.2	274.9	73.5	71.9	279.1	6.2	6.2	206Pb/238U concordant scans	84	129
16CL-DZ2	178-01	zircon	1781AZ1_102	116	87	1.33	0.27	0.02	0.0384	0.0009	0.052	0.004	0.09	247.2	17.2	17	242.9	5.8	5.8	287.9	184.7	174.7	242.9	5.8	5.8	206Pb/238U concordant scans	63	129
16CL-DZ2	178-01	zircon	1781AZ1_103	440	221	1.98	0.3	0.01	0.0418	0.0009	0.0522	0.0019	0.17	267.3	8.7	8.7	264	5.7	5.7	296.9	86.2	83.9	264	5.7	5.7	206Pb/238U concordant scans	87	129
16CL-DZ2	178-01	zircon	1781AZ1_104	308	182	1.68	0.26	0.01	0.0375	0.0008	0.0514	0.0019	0.16	239.4	8.1	8.1	237.3	5.2	5.2	259.8	90	87.6	237.3	5.2	5.2	206Pb/238U concordant scans	86	128
16CL-DZ2	178-01	zircon	1781AZ1_105	1470	1288	1.14	0.23	0	0.0334	0.0009	0.0519	0.0015	0.42	217.8	6.2	6.2	212	5.8	5.8	281.3	70	68.5	212	5.8	5.8	206Pb/238U concordant scans	100	129
16CL-DZ2	178-01	zircon	1781AZ1_106	292	167	1.74	0.23	0.01	0.0337	0.0006	0.0495	0.0027	0.11	210.5	10.5	10.4	214	4.1	4.1	171.7	130.9	125.9	214	4.1	4.1	206Pb/238U concordant scans	93	129
16CL-DZ2	178-01	zircon	1781AZ1_107	320	200	1.59	0.43	0.01	0.0586	0.0011	0.0544	0.0016	0.17	370.1	9.5	9.4	367.2	6.9	6.9	388.7	68.8	67.3	367.2	6.9	6.9	206Pb/238U concordant scans	97	128
16CL-DZ2	178-01	zircon	1781AZ1_108	262	108	2.4	0.53	0.03	0.0683	0.0042	0.0567	0.0038	0.41	434.8	23.4	23.1	426	25.5	25.4	481.6	152.8	145.9	426	25.5	25.4	206Pb/238U concordant scans	107	127
16CL-DZ2	178-01	zircon	1781AZ1_109	219	122	1.79	0.23	0.01	0.0337	0.0008	0.0506	0.0029	0.11	214.6	11.2	11.1	213.6	5	5	224.7	137.5	131.9	213.6	5	5	206Pb/238U concordant scans	65	126
16CL-DZ2	178-01	zircon	1781AZ1_110	189	180	1.05	0.5	0.01	0.0662	0.0013	0.0553	0.0021	0.12	415.4	13.3	13.2	413.7	8.2	8.2	424.9	88.7	86.3	413.7	8.2	8.2	206Pb/238U concordant scans	90	128
16CL-DZ3	178-02	zircon	1782AZ1_1	63	29	2.18	5.33	0.14	0.3342	0.0071	0.1156	0.003	0.44	1873.7	23.8	23.5	1859.1	34.5	34.4	1889.8	48.1	47.3	1889.8	48.1	47.3	207Pb/206Pb concordant scans	100	125
16CL-DZ3	178-02	zircon	1782AZ1_2	64	55	1.17	3.19	0.09	0.252	0.0056	0.0918	0.0026	0.4	1455	22.5	22.3	1448.9	29.2	29.2	1464	54.9	53.9	1448.9	29.2	29.2	206Pb/238U concordant scans	90	126
16CL-DZ3	178-02	zircon	1782AZ1_3	110	55	2	0.31	0.02	0.0421	0.0011	0.0535	0.0046	0.11	275.1	20.8	20.6	266.1	7.4	7.3	351.9	204.1	191.9	266.1	7.4	7.3	206Pb/238U concordant scans	61	129
16CL-DZ3	178-02	zircon	1782AZ1_4	538	479	1.12	0.25	0.01	0.0366	0.001	0.0505	0.0018	0.51	230.9	8.5	8.5	232.1	6.5	6.5	219.5	84.9	82.7	232.1	6.5	6.5	206Pb/238U concordant scans	93	129
16CL-DZ3	178-02	zircon	1782AZ1_5	523	257	2.03	0.25	0.01	0.0367	0.0009	0.0505	0.0019	0.38	231.5	8.5	8.5	232.4	5.8	5.8	222.2	92.3	89.7	232.4	5.8	5.8	206Pb/238U concordant scans	87	129
16CL-DZ3	178-02	zircon	1782AZ1_6	113	75	1.49	4.89	0.11	0.3217	0.0067	0.1103	0.0025	0.48	1801.8	20.2	20	1798.4	33.1	33	1805.7	42.1	41.5	1805.7	42.1	41.5	207Pb/206Pb concordant scans	111	129
16CL-DZ3	178-02	zircon	1782AZ1_7	45	21	2.08	2.55	0.08	0.2199	0.0045	0.0843	0.0028	0.32	1289	25.5	25.2	1281.7	24.2	24.1	1301.2	67.2	65.8	1281.7	24.2	24.1	206Pb/238U concordant scans	103	129
16CL-DZ3	178-02	zircon	1782AZ1_8	174	208	0.83	0.36	0.01	0.0499	0.0012	0.0535	0.0028	0.2	318.6	14.7	14.5	313.9	7.5	7.5	352.7	124.5	119.9	313.9	7.5	7.5	206Pb/238U concordant scans	60	129
16CL-DZ3	178-02	zircon	1782AZ1_9	221	166	1.33	0.23	0.01	0.0333	0.0007	0.0513	0.0029	0.17	215	11	11	211.4	4.8	4.8	254.3	135.2	129.8	211.4	4.8	4.8	206Pb/238U concordant scans	82	129
16CL-DZ3	178-02	zircon	1782AZ1_10	437	87	5	1.33	0.03	0.14	0.0031	0.069	0.0016	0.5	860.6	15.1	14.9	844.8	17.7	17.7	901.6	50.3	49.5	844.8	17.7	17.7	206Pb/238U concordant scans	105	126
16CL-DZ3	178-02	zircon	1782AZ1_11	136	51	2.67	0.36	0.02	0.0495	0.0011	0.0533	0.0032	0.17	315.6	16.6	16.5	311.8	6.8	6.8	343.8	142	136	311.8	6.8	6.8	206Pb/238U concordant scans	80	129
16CL-DZ3	178-02	zircon	1782AZ1_12	260	50	5.2	1.4	0.08	0.1423	0.0049	0.0716	0.0042	0.31	891.5	35.7	35.1	858.2	28	28	975.1	122.4	117.7	858.2	28	28	206Pb/238U concordant scans	14	129
16CL-DZ3	178-02	zircon	1782AZ1_13	212	144	1.46	1.2	0.03	0.1325	0.0026	0.0659	0.0017	0.4	803.1	14.8	14.7	802.6	15.2	15.2	804.7	55.3	54.3	802.6	15.2	15.2	206Pb/238U concordant scans	115	129
16CL-DZ3	178-02	zircon	1782AZ1_14	229	106	2.15	1.41	0.03	0.1479	0.0029	0.0693	0.0016	0.42	895	14.7	14.6	889.2	16.8	16.8	909.4	50.8	50	889.2	16.8	16.8	206Pb/238U concordant scans	113	129
16CL-DZ3	178-02	zircon	1782AZ1_15	38	48	0.78	3.12	0.1	0.2479	0.0054	0.0914	0.003	0.32	1438.9	25.4	25.1	1427.8	28	28	1455.4	63.4	62.1	1427.8	28	28	206Pb/238U concordant scans	97	129
16CL-DZ3	178-02	zircon	1782AZ1_16	428	164	2.59	0.26	0	0.0375	0.0008	0.0512	0.0019	0.31	238.9	7.9	7.9	237.4	5.5	5.5	253.8	87.7	85.4	237.4	5.5	5.5	206Pb/238U concordant scans	75	129
16CL-DZ3	178-02	zircon	1782AZ1_17	606	267	2.26	0.37	0.01	0.051	0.0014	0.0529	0.0014	0.6	321.8	9.1	9.1	321.2	8.7	8.7	326.2	63	61.8	321.2	8.7	8.7	206Pb/238U concordant scans	95	127
16CL-DZ3	178-02	zircon	1782AZ1_18	114	74	1.53	5.5	0.13	0.3372	0.0066	0.1184	0.0028	0.42	1901.7	20.9	20.7	1873.2	32.2	32.1	1933	43	42.4	1933	43	42.4	207Pb/206Pb concordant scans	97	127
16CL-DZ3	178-02	zircon	1782AZ1_19	128	102	1.24	5.98	0.32	0.3362	0.0121	0.129	0.0071	0.29	1973.5	47	46	1868.4	58.9	58.6	2085.5	98.6	95.4	2085.5	98.6	95.4	207Pb/206Pb concordant scans	10	125
16CL-DZ3	178-02	zircon	1782AZ1_20	44	15	2.77	1.15	0.06	0.1299	0.0031	0.0643	0.0036	0.17	778.2	30.4	30	787.4	17.9	17.8	752.1	121.7	117.2	787.4	17.9	17.8	206Pb/238U concordant scans	83	129
16CL-DZ3	178-02	zircon	1782AZ1_21	36	18	1.99	3.79	0.14	0.2692	0.0065	0.1021	0.0038	0.3	1591.2	30.4	29.9	1536.8	33.1	33.1	1664.1	71.2	69.6	1664.1	71.2	69.6	207Pb/206Pb concordant scans	72	129
16CL-DZ3	178-02	zircon	1782AZ1_22	33	12	2.61	0.51	0.06	0.0677	0.0021	0.0549	0.0074	0.06	420.7	46.5	45.5	422.7	12.9	12.9	409.5	317.6	289.1	422.7	12.9	12.9	206Pb/238U concordant scans	56	129
16CL-DZ3	178-02	zircon	1782AZ1_23	121	61	1.98	0.42	0.02	0.0573	0.0013	0.0537	0.003	0.17	359.8	16.9	16.8	359.6	8.3	8.3	361.1	130.1	125	359.6	8.3	8.3	206Pb/238U concordant scans	67	129
16CL-DZ3	178-02	zircon	1782AZ1_24	172	59	2.92	0.54	0.02	0.0706	0.0015	0.0561	0.0021	0.28	443.1	13.3	13.3	440.1	9.4	9.4	458.9	84	81.8	440.1	9.4	9.4	206Pb/238U concordant scans	88	129
16CL-DZ3	178-02	zircon	1782AZ1_25	211	100	2.09	0.33	0.01	0.046	0.001	0.0534	0.0024	0.22	296.8	11.5	11.4	290.1	6.4	6.4	349.5	104	100.7	290.1	6.4	6.4	206Pb/238U concordant scans	74	126
16CL-DZ3	178-02	zircon	1782AZ1_26	125	42	2.92	0.63	0.02	0.0804	0.0017	0.0572	0.0026	0.2	499.4	18.1	18	498.6	10.5	10.5	503	104.5	101.2	498.6	10.5	10.5	206Pb/238U concordant scans	93	125
16CL-DZ3	178-02	zircon	1782AZ1_27	355	34	10.38	5.08	0.11	0.3217	0.0065	0.1146	0.0024	0.48	1833.9	18.5	18.3	1798.4	32	31.9	1874.4	38.7	38.2	1874.4	38.7	38.2	207Pb/206Pb concordant scans	103	129
16CL-DZ3	178-02	zircon	1782AZ1_28	81	39	2.09	0.49	0.04	0.0645	0.0017	0.0556	0.0046	0.13	408.7	28	27.6	403.1	10.3	10.3	440.2	191.7	180.8	403.1	10.3	10.3	206Pb/238U concordant scans	52	129
16CL-DZ3	178-02	zircon	1782AZ1_29	554	233	2.37	1.7	0.12	0.1665	0.0121	0.0741	0.004	0.72	1009.6	47.7	46.6	992.9	67	66.7	1046	112.4	108.5	992.9	67	66.7	206Pb/238U concordant scans	127	129
16CL-DZ3	178-02	zircon	1782AZ1_30	413	335	1.23	1.54	0.1	0.1577	0.0113	0.071	0.004	0.67	948.7	44	43	944.1	63.3	62.9	959.5	118.8	114.4	944.1	63.3	62.9	206Pb/238U concordant scans	125	129
16CL-DZ3	178-02	zircon	1782AZ1_31	371	184	2	4.05	0.29	0.2876	0.0219	0.1022	0.0064	0.63	1645.5	59.6	57.9	1629.8	110.2	109.2	1665.8	119.2	114.6	1665.8	119.2	114.6	207Pb/206Pb concordant scans	129	129
16CL-DZ3	178-02	zircon	1782AZ1_32	502	127	3.95	6.09	0.66	0.3083	0.0348	0.1433	0.012	0.71	1989.6	97	92.6	1732.6	172.9	170.6	2268.3	148.5	141.3	2268.3	148.5	141.3	207Pb/206Pb concordant scans	72	129
16CL-DZ3	178-02	zircon	1782AZ1_33	280	205	1.36	0.43	0.01	0.0583	0.0013	0.0542	0.002	0.29	367.8	11.3	11.3	365.8	8	8	380.4	84.1	81.9	365.8	8	8	206Pb/238U concordant scans	79	129
16CL-DZ3	178-02	zircon	1782AZ1_34	480	101	4.72	2.23	0.12	0.1999	0.011	0.0809	0.0038	0.64	1191.1	40	39.2	1175	59.5	59.3	1220.4	94.7	91.8	1175	59.5	59.3	206Pb/238U concordant scans	124	129
16CL-DZ3	178-02	zircon	1782AZ1_35	229	160	1.42	0.35	0.01	0.0485	0.001	0.0532	0.0023	0.23	309.5	11.7	11.6	305.3	6.5	6.5	341.2	101.6	98.5	305.3	6.5	6.5	206Pb/238U concordant scans	83	129
16CL-DZ3	178-02	zircon	1782AZ1_36	264	136	1.93	1.48	0.03	0.1544	0.0031	0.0698	0.0017	0.42	925.5	15.3	15.2	925.9	17.4	17.4	924.5	51.1	50.3	925.9	17.4	17.4	206Pb/238U concordant scans	109	127
16CL-DZ3	178-02	zircon	1782AZ1_37	357	25	14.22	0.57	0.01	0.0738	0.0015	0.0568	0.0016	0.37	463.9	10.9	10.8	459.5	9.3	9.3	485.8	64.5	63.2	459.5	9.3	9.3	206Pb/238U concordant scans	89	129
16CL-DZ3	178-02	zircon	1782AZ1_38	696	17	38.82	0.51	0.01	0.068	0.0017	0.055	0.0013	0.6	422.7	9.8	9.7	424.5	10.2	10.2	412.5	53.5	52.6	424.5	10.2	10.2	206Pb/238U concordant scans	98	129
16CL-DZ3	178-02	zircon	1782AZ1_39	226	135	1.67	0.51	0.01	0.0678	0.0014	0.0551	0.0018	0.31	422.2	11.7	11.6	423	8.7	8.7	418.1	76.4	74.6	423	8.7	8.7	206Pb/238U concordant scans	75	128
16CL-DZ3	178-02	zircon	1782AZ1_40	162	85	1.9	1.42	0.03	0.1493	0.0031	0.0692	0.0018	0.42	900.3	16.8	16.6	897.4	17.5	17.5	907.3	56	55	897.4	17.5	17.5	206Pb/238U concordant scans	106	126
16CL-DZ3	178-02	zircon	1782AZ1_41	270	182	1.48	2.45	0.06	0.2078	0.0048	0.0856	0.0023	0.45	1258.9	20.3	20.1	1217.2	25.6	25.6	1331	52.9	52	1217.2	25.6	25.6	206Pb/238U concordant scans	69	127
16CL-DZ3	178-02	zircon	1782AZ1_42	178	86	2.06	0.28	0.01	0.038	0.0009	0.0541	0.0035	0.16	253.7	14.7	14.6	240.6	5.9	5.9	376.8	152	145.2	240.6	5.9	5.9	206Pb/238U concordant scans	65	125
16CL-DZ3	178-02	zircon	1782AZ1_43	40	58	0.68	5.63	0.17	0.3446	0.0075	0.1186	0.0035	0.36	1922	26.2	25.9	1908.9	36.3	36.2	1936.2	54.4	53.4	1936.2	54.4	53.4	207Pb/206Pb concordant scans	107	127
16CL-DZ3	178-02	zircon	1782AZ1_44	110	36	3	0.39	0.02	0.0533	0.0013	0.0534	0.0035	0.16	337	19	18.8	335.2	8.1	8.1	349.8	154.1	147.1	335.2	8.1	8.1	206Pb/238U concordant scans	77	129
16CL-DZ3	178-02	zircon	1782AZ1_45	409	90	4.51	1.4	0.03	0.1467	0.003	0.0695	0.0016	0.45	892.1	14.8	14.7	882.8	17.1	17.1	915	50.1	49.3	882.8	17.1	17.1	206Pb/238U concordant scans	121	129
16CL-DZ3	178-02	zircon	1782AZ1_46	522	98	5.28	1.37	0.03	0.1464	0.0035	0.0681	0.0016	0.54	878.5	16.4	16.2	880.7	19.7	19.7	872.9	51.9	51	880.7	19.7	19.7	206Pb/238U concordant scans	114	128
16CL-DZ3	178-02	zircon	1782AZ1_47	425	207	2.05	6.11	0.14	0.3552	0.0076	0.1247	0.0027	0.51	1991.8	20.1	19.9	1959.4	36.3	36.2	2025.6	39.3	38.7	2025.6	39.3	38.7	207Pb/206Pb concordant scans	121	126
16CL-DZ3	178-02	zircon	1782AZ1_48	62	99	0.62	1.07	0.05	0.1209	0.0028	0.0642	0.0034	0.21	739.5	28.2	27.8	736	16.5	16.5	750.1	115.4	111.3	736	16.5	16.5	206Pb/238U concordant scans	81	124
16CL-DZ3	178-02	zircon	1782AZ1_49	724	225	3.21	0.22	0	0.0325	0.0008	0.0506	0.0017	0.44	207.8	7.1	7.1	206.4	5.4	5.4	224.3	82.7	80.6	206.4	5.4	5.4	206Pb/238U concordant scans	95	126
16CL-DZ3	178-02	zircon	1782AZ1_50	93	66	1.4	0.59	0.03	0.0761	0.0019	0.0567	0.0037	0.16	474.2	24.6	24.3	472.8	11.4	11.4	480.8	148.2	141.6	472.8	11.4	11.4	206Pb/238U concordant scans	82	127
16CL-DZ3	178-02	zircon	1782AZ1_51	489	211	2.31	0.48	0.01	0.0647	0.0015	0.0542	0.0015	0.45	401.1	10.4	10.4	404.4	9.1	9.1	381.8	66.7	65.3	404.4	9.1	9.1	206Pb/238U concordant scans	108	126
16CL-DZ3	178-02	zircon	1782AZ1_52	390	175	2.21	0.35	0.01	0.05	0.0011	0.052	0.0018	0.32	311.4	9.4	9.4	314.6	6.8	6.8	287.5	81.1	79.1	314.6	6.8	6.8	206Pb/238U concordant scans	80	125
16CL-DZ3	178-02	zircon	1782AZ1_53	263	163	1.6	6.57	0.15	0.3699	0.0076	0.1288	0.0028	0.49	2055.5	20.3	20.1	2029.2	36.2	36	2082.1	39.2	38.7	2082.1	39.2	38.7	207Pb/206Pb concordant scans	114	127
16CL-DZ3	178-02	zircon	1782AZ1_54	710	403	1.76	0.29	0.01	0.0416	0.001	0.0519	0.0015	0.49	264.8	7.8	7.8	262.9	6.6	6.6	281.2	70.9	69.4	262.9	6.6	6.6	206Pb/238U concordant scans	72	126
16CL-DZ3	178-02	zircon	1782AZ1_55	993	194	5.1	5.21	0.14	0.321	0.008	0.1178	0.0026	0.61	1855.2	23.2	22.9	1794.6	39.5	39.4	1923.7	41.2	40.7	1923.7	41.2	40.7	207Pb/206Pb concordant scans	63	129
16CL-DZ3	178-02	zircon	1782AZ1_56	149	123	1.2	0.35	0.02	0.0482	0.0011	0.0532	0.0036	0.13	307.7	17.9	17.8	303.5	7.2	7.2	340	159.1	151.6	303.5	7.2	7.2	206Pb/238U concordant scans	80	129
16CL-DZ3	178-02	zircon	1782AZ1_57	529	67	7.82	1.8	0.06	0.1679	0.0052	0.078	0.002	0.69	1048.3	22.7	22.5	1000.8	28.8	28.8	1148.6	51.7	50.8	1000.8	28.8	28.8	206Pb/238U concordant scans	58	128
16CL-DZ3	178-02	zircon	1782AZ1_58	400	238	1.67	0.41	0.01	0.0571	0.0016	0.0532	0.0019	0.39	355.5	11	10.9	358.2	10	10	338.3	84.1	82	358.2	10	10	206Pb/238U concordant scans	90	129
16CL-DZ3	178-02	zircon	1782AZ1_59	373	115	3.21	0.5	0.02	0.0671	0.0025	0.0549	0.0023	0.43	417.7	14.4	14.3	418.8	15.5	15.4	411.6	97.1	94.3	418.8	15.5	15.4	206Pb/238U concordant scans	113	129
16CL-DZ3	178-02	zircon	1782AZ1_60	330	181	1.81	0.91	0.02	0.1074	0.0024	0.0614	0.0018	0.37	657.1	14.2	14.1	657.8	14.3	14.2	654.5	64.4	63.1	657.8	14.3	14.2	206Pb/238U concordant scans	116	129
16CL-DZ3	178-02	zircon	1782AZ1_61	224	134	1.66	0.51	0.01	0.0681	0.0015	0.0544	0.002	0.28	419.6	12.6	12.5	424.7	9.1	9.1	391.3	84.2	82.1	424.7	9.1	9.1	206Pb/238U concordant scans	78	128
16CL-DZ3	178-02	zircon	1782AZ1_62	455	118	3.83	5	0.15	0.3223	0.0098	0.1126	0.0032	0.55	1820.2	26.6	26.2	1800.9	48.1	48	1842.2	53	52.1	1842.2	53	52.1	207Pb/206Pb concordant scans	118	129
16CL-DZ3	178-02	zircon	1782AZ1_63	140	136	1.03	6.35	0.14	0.3672	0.0074	0.1254	0.0028	0.46	2025.4	20.1	19.9	2016.2	35	34.9	2034.7	39.9	39.4	2034.7	39.9	39.4	207Pb/206Pb concordant scans	119	129
16CL-DZ3	178-02	zircon	1782AZ1_64	229	206	1.11	4.55	0.14	0.3105	0.0089	0.1063	0.0033	0.45	1740.9	26.5	26.1	1743.6	44.2	44.1	1737.7	58.4	57.3	1737.7	58.4	57.3	207Pb/206Pb concordant scans	126	129
16CL-DZ3	178-02	zircon	1782AZ1_65	450	168	2.67	0.51	0.03	0.067	0.0037	0.0561	0.0035	0.52	424.4	24.3	24.1	418.1	22.4	22.3	458.4	141.8	135.8	418.1	22.4	22.3	206Pb/238U concordant scans	38	129
16CL-DZ3	178-02	zircon	1782AZ1_66	355	24	14.4	0.57	0.01	0.074	0.0015	0.0567	0.0016	0.36	464.1	11	11	460.2	9.5	9.5	483.5	66.2	64.9	460.2	9.5	9.5	206Pb/238U concordant scans	99	129
16CL-DZ3	178-02	zircon	1782AZ1_67	315	209	1.5	0.26	0.01	0.0373	0.0009	0.0506	0.0027	0.21	235.7	11.3	11.2	236.6	6	6	226.8	127.8	123	236.6	6	6	206Pb/238U concordant scans	73	129
16CL-DZ3	178-02	zircon	1782AZ1_68	334	123	2.7	0.81	0.02	0.1001	0.0021	0.0591	0.0016	0.4	606.2	12.6	12.5	615.1	12.4	12.4	572.9	59.9	58.8	615.1	12.4	12.4	206Pb/238U concordant scans	108	129
16CL-DZ3	178-02	zircon	1782AZ1_69	251	76	3.3	5.11	0.11	0.3283	0.0069	0.113	0.0025	0.46	1839	19.8	19.6	1830.2	33.6	33.6	1849	41.7	41.1	1849	41.7	41.1	207Pb/206Pb concordant scans	126	129
16CL-DZ3	178-02	zircon	1782AZ1_70	48	20	2.31	0.47	0.05	0.0625	0.0022	0.0552	0.0064	0.1	395.4	37.7	37	391	13.6	13.6	420.9	270	249.1	391	13.6	13.6	206Pb/238U concordant scans	78	129
16CL-DZ3	178-02	zircon	1782AZ1_71	373	155	2.4	1.33	0.03	0.1424	0.0032	0.068	0.0016	0.46	861.2	14.5	14.4	858.2	18	18	868.9	51.5	50.6	858.2	18	18	206Pb/238U concordant scans	119	129
16CL-DZ3	178-02	zircon	1782AZ1_72	227	205	1.1	4.59	0.14	0.3123	0.0089	0.1066	0.0033	0.45	1748.2	26.3	26	1752.1	44	43.9	1743.6	58.2	57.1	1743.6	58.2	57.1	207Pb/206Pb concordant scans	126	129
16CL-DZ3	178-02	zircon	1782AZ1_73	503	122	4.1	1.15	0.03	0.1218	0.003	0.0688	0.0019	0.44	780	15	14.9	741	17.6	17.6	893	58.1	57	741	17.6	17.6	206Pb/238U concordant scans	65	129
16CL-DZ3	178-02	zircon	1782AZ1_74	389	216	1.8	0.55	0.01	0.0708	0.0016	0.0571	0.0017	0.37	450.1	11.2	11.2	441.1	10	10	495.9	68.9	67.5	441.1	10	10	206Pb/238U concordant scans	79	129
16CL-DZ3	178-02	zircon	1782AZ1_75	558	247	2.25	0.33	0.01	0.0457	0.001	0.0526	0.0015	0.4	290.7	7.7	7.7	288.1	6.4	6.4	312.1	68.8	67.3	288.1	6.4	6.4	206Pb/238U concordant scans	81	129
16CL-DZ3	178-02	zircon	1782AZ1_76	293	334	0.87	0.38	0.01	0.0515	0.0011	0.0542	0.0022	0.24	331.5	11.6	11.6	324.1	6.7	6.7	383.3	94.6	91.9	324.1	6.7	6.7	206Pb/238U concordant scans	77	129
16CL-DZ3	178-02	zircon	1782AZ1_77	188	113	1.65	0.23	0.01	0.0328	0.0009	0.0528	0.0038	0.13	217.8	13.9	13.8	208	5.8	5.8	324.1	170.3	161.8	208	5.8	5.8	206Pb/238U concordant scans	71	129
16CL-DZ3	178-02	zircon	1782AZ1_78	128	89	1.43	0.37	0.02	0.0504	0.0013	0.0531	0.0034	0.16	319.6	17.6	17.4	317.5	8	8	335.2	150.7	144	317.5	8	8	206Pb/238U concordant scans	76	128
16CL-DZ3	178-02	zircon	1782AZ1_79	450	287	1.56	0.34	0.02	0.045	0.0011	0.0552	0.0033	0.21	299.5	15.5	15.4	283.8	7.1	7.1	424	136.3	130.8	283.8	7.1	7.1	206Pb/238U concordant scans	31	129
16CL-DZ3	178-02	zircon	1782AZ1_80	263	134	1.96	6.58	0.17	0.3604	0.0084	0.1325	0.0034	0.45	2057.6	23.3	23.1	1984.4	40.1	40	2131.8	46.1	45.4	2131.8	46.1	45.4	207Pb/206Pb concordant scans	71	128
16CL-DZ3	178-02	zircon	1782AZ1_81	699	209	3.34	0.32	0.01	0.045	0.001	0.052	0.0014	0.5	284.6	7.9	7.9	284.3	6.5	6.5	286.9	66.2	64.9	284.3	6.5	6.5	206Pb/238U concordant scans	101	128
16CL-DZ3	178-02	zircon	1782AZ1_82	970	256	3.78	0.58	0.03	0.0724	0.0024	0.0587	0.0028	0.45	469.2	20.2	20	451.1	14.5	14.5	559.1	107.9	104.3	451.1	14.5	14.5	206Pb/238U concordant scans	15	128
16CL-DZ3	178-02	zircon	1782AZ1_83	183	102	1.79	10.39	0.25	0.4457	0.0092	0.169	0.0039	0.48	2470.2	23	22.7	2376.4	41.1	41	2548.3	39.1	38.6	2548.3	39.1	38.6	207Pb/206Pb concordant scans	43	129
16CL-DZ3	178-02	zircon	1782AZ1_84	885	359	2.46	0.3	0	0.0417	0.0009	0.0521	0.0013	0.46	266.4	6.6	6.6	263.6	5.6	5.6	291.6	61.3	60.1	263.6	5.6	5.6	206Pb/238U concordant scans	94	129
16CL-DZ3	178-02	zircon	1782AZ1_85	410	359	1.14	0.31	0.01	0.0447	0.001	0.0511	0.0019	0.32	278.3	9.3	9.2	282.2	6.2	6.2	245.9	87.7	85.4	282.2	6.2	6.2	206Pb/238U concordant scans	66	126
16CL-DZ3	178-02	zircon	1782AZ1_86	451	460	0.97	9.53	0.21	0.4364	0.009	0.1584	0.0034	0.49	2391	21	20.8	2334.5	40.6	40.5	2439.4	37.4	36.9	2439.4	37.4	36.9	207Pb/206Pb concordant scans	82	129
16CL-DZ3	178-02	zircon	1782AZ1_87	942	603	1.56	1.49	0.04	0.1481	0.0036	0.073	0.0017	0.58	927.3	16.9	16.7	890.8	20.7	20.6	1015.1	49	48.2	890.8	20.7	20.6	206Pb/238U concordant scans	62	129
16CL-DZ3	178-02	zircon	1782AZ1_88	1051	230	4.56	2.99	0.06	0.2437	0.0049	0.0892	0.0018	0.54	1407.4	17.7	17.5	1406.2	25.7	25.6	1409.2	40.4	39.8	1406.2	25.7	25.6	206Pb/238U concordant scans	124	128
16CL-DZ3	178-02	zircon	1782AZ1_89	45	21	2.09	2.61	0.09	0.2251	0.0045	0.0843	0.0028	0.31	1305.3	25.8	25.4	1308.8	24	24	1299.7	67.5	66	1308.8	24	24	206Pb/238U concordant scans	105	129
16CL-DZ3	178-02	zircon	1782AZ1_90	569	1234	0.46	0.56	0.02	0.0717	0.0023	0.0566	0.0017	0.64	451.7	13.9	13.8	446.5	14.3	14.2	478.4	67.4	66	446.5	14.3	14.2	206Pb/238U concordant scans	88	129
16CL-DZ3	178-02	zircon	1782AZ1_91	363	107	3.37	0.52	0.01	0.0686	0.0014	0.0559	0.0017	0.33	431.2	10.7	10.7	427.8	8.5	8.5	449.8	68.9	67.4	427.8	8.5	8.5	206Pb/238U concordant scans	88	129
16CL-DZ3	178-02	zircon	1782AZ1_92	105	32	3.23	3.1	0.08	0.2491	0.0048	0.0905	0.0024	0.37	1434.9	21	20.8	1433.8	25	24.9	1436.6	51.6	50.8	1433.8	25	24.9	206Pb/238U concordant scans	115	128
16CL-DZ3	178-02	zircon	1782AZ1_93	335	331	1.01	0.36	0.01	0.0509	0.001	0.0525	0.0019	0.27	319.2	10.3	10.2	320.5	6.5	6.5	310.1	86.6	84.3	320.5	6.5	6.5	206Pb/238U concordant scans	76	129
16CL-DZ3	178-02	zircon	1782AZ1_94	227	168	1.34	7.8	0.17	0.4024	0.0078	0.1406	0.0029	0.47	2208.8	19.8	19.6	2180.2	35.9	35.8	2235.5	36.9	36.4	2235.5	36.9	36.4	207Pb/206Pb concordant scans	107	128
16CL-DZ3	178-02	zircon	1782AZ1_95	456	119	3.83	5.1	0.15	0.326	0.0094	0.1135	0.0031	0.55	1837.3	25.8	25.5	1819.4	45.8	45.6	1857.7	50.8	49.9	1857.7	50.8	49.9	207Pb/206Pb concordant scans	124	129
16CL-DZ3	178-02	zircon	1782AZ1_96	224	76	2.91	0.34	0.01	0.0476	0.0013	0.0527	0.0026	0.29	302	13.1	13	299.8	8.2	8.2	319	115.1	111.1	299.8	8.2	8.2	206Pb/238U concordant scans	84	129
16CL-DZ3	178-02	zircon	1782AZ1_97	156	67	2.33	0.49	0.02	0.0646	0.0013	0.0552	0.0024	0.21	406.5	15	14.9	404	8	8	421.1	102.1	98.9	404	8	8	206Pb/238U concordant scans	99	129
16CL-DZ3	178-02	zircon	1782AZ1_98	136	117	1.16	2.94	0.07	0.2396	0.0051	0.0892	0.0022	0.43	1394.4	19	18.8	1385	26.6	26.5	1408.8	47.8	47	1385	26.6	26.5	206Pb/238U concordant scans	95	129
16CL-DZ3	178-02	zircon	1782AZ1_99	590	434	1.36	0.28	0	0.0397	0.0008	0.0519	0.0015	0.38	254.2	6.9	6.8	251.2	5	5	282.1	68.3	66.9	251.2	5	5	206Pb/238U concordant scans	86	129
16CL-DZ3	178-02	zircon	1782AZ1_100	142	137	1.03	6.46	0.14	0.3704	0.0066	0.1265	0.0026	0.43	2040.6	19.2	19	2031.4	31.2	31.1	2049.9	37.7	37.3	2049.9	37.7	37.3	207Pb/206Pb concordant scans	118	129
16CL-DZ3	178-02	zircon	1782AZ1_101	475	56	8.34	9.89	0.2	0.4531	0.0082	0.1583	0.0031	0.47	2424.9	19.4	19.2	2409.1	36.6	36.5	2438.2	34.3	33.9	2438.2	34.3	33.9	207Pb/206Pb concordant scans	108	129
16CL-DZ3	178-02	zircon	1782AZ1_102	190	114	1.66	0.24	0.01	0.034	0.0008	0.052	0.0032	0.14	221.6	12.2	12.1	215.6	5.3	5.3	285.4	146.6	140.3	215.6	5.3	5.3	206Pb/238U concordant scans	69	129
16CL-DZ3	178-02	zircon	1782AZ1_103	513	71	7.19	1.49	0.03	0.1544	0.003	0.0701	0.0016	0.43	927.7	14.7	14.6	926	16.9	16.9	931.7	48.6	47.8	926	16.9	16.9	206Pb/238U concordant scans	110	129
16CL-DZ3	178-02	zircon	1782AZ1_104	338	131	2.57	0.64	0.02	0.0807	0.0024	0.0579	0.0021	0.41	505.3	14.6	14.5	500.7	14.6	14.6	526.5	81.2	79.2	500.7	14.6	14.6	206Pb/238U concordant scans	100	129
16CL-DZ3	178-02	zircon	1782AZ1_105	132	39	3.38	0.93	0.04	0.1084	0.0036	0.0623	0.0027	0.38	669.2	21.6	21.4	664	21.1	21	686.9	94.7	91.9	664	21.1	21	206Pb/238U concordant scans	90	129
16CL-DZ3	178-02	zircon	1782AZ1_106	144	100	1.44	0.25	0.02	0.0343	0.0011	0.0536	0.0052	0.12	229.9	20	19.8	217.5	7.2	7.2	358	230.4	215	217.5	7.2	7.2	206Pb/238U concordant scans	41	128
16CL-DZ3	178-02	zircon	1782AZ1_107	685	284	2.4	0.23	0	0.0339	0.001	0.051	0.0017	0.57	217.4	8	8	215.2	6.5	6.5	241.5	80.3	78.4	215.2	6.5	6.5	206Pb/238U concordant scans	80	128
16CL-DZ3	178-02	zircon	1782AZ1_108	1011	286	3.53	0.34	0	0.0478	0.0009	0.0522	0.0012	0.44	300.4	6.7	6.7	301.2	5.8	5.8	294.2	56.4	55.4	301.2	5.8	5.8	206Pb/238U concordant scans	96	129
16CL-DZ3	178-02	zircon	1782AZ1_109	319	177	1.8	0.36	0.01	0.0503	0.0009	0.0529	0.0018	0.24	317.6	9.6	9.6	316.6	5.7	5.7	324.6	81.6	79.6	316.6	5.7	5.7	206Pb/238U concordant scans	80	129
16CL-DZ3	178-02	zircon	1782AZ1_110	331	182	1.81	0.94	0.02	0.11	0.0022	0.0622	0.0017	0.35	675.3	13.8	13.7	673	13.1	13.1	683.1	60.6	59.5	673	13.1	13.1	206Pb/238U concordant scans	118	129

## Sheet: Zircon_data_SC
USGS_Sample	LAB_sample	Mineral	Analysis_Name	U_conc_ppm	Th_conc_ppm	207Pb_235U_Ratio	207Pb_235U_Unc	206Pb_238U_Ratio	206Pb_238U_Unc	207Pb_206Pb_Ratio	207Pb_206Pb_Unc	Error_Correlation	206Pb_238U_Age	206Pb_238U_Age_Unc
13ALR201	2-i	zircon	2-i-6	98.3	54	0.2453	0.00672524	0.03505	0.000747664	0.05068	0.00131007	0.307114	222.051	4.69922
13ALR201	2-i	zircon	2-i-5	191.6	83	0.2552	0.00654682	0.03533	0.000775683	0.05237	0.00130593	0.441375	223.325	4.86339
13ALR201	2-i	zircon	2-i-7	233.9	116.1	0.2546	0.00641393	0.03714	0.000987042	0.04978	0.00112322	0.651781	235.407	6.19294
13ALR201	2-i	zircon	2-i-4	178.5	135.1	0.2684	0.00640823	0.03786	0.000814464	0.0511	0.00126178	0.545538	239.516	5.10643
13ALR201	2-i	zircon	2-i-1	146	86	0.2702	0.00837635	0.03844	0.000890816	0.05072	0.00134948	0.469032	243.258	5.58564
Uncertainties are 2 sigma

## Sheet: Tab S4 info
Table S4. Detrital zircon data
This Supplemental Material accompanies
Dumoulin, J.A., Whidden, K.J., Rouse, W.A., Lease, R.O., Boehlke, A., and O’Sullivan, P., 2022,
Biosiliceous, organic-rich, and phosphatic facies of Triassic strata of northwest Alaska: Transect across
a high-latitude, low-angle continental margin, in Aiello, I., Barron, J., and Ravelo, C., eds., Understanding
the Monterey Formation and Similar Biosiliceous Units across Space and Time: Geological Society of
America Special Paper 556, https://doi.org/10.1130/2022.2556(11).
